# Supplementary material for: Cryomicroscopy of radiation sensitive specimens on unmodified graphene sheets: Reduction of electron-optical effects of charging
Source: PubMed Central journal article supplement — J Struct Biol. 2013 Sep;183(3):531–6. doi: 10.1016/j.jsb.2013.04.014 (PMC3778975; doi:10.1016/j.jsb.2013.04.014), 2013-09
Supplement: mmc4.pdf [file mmc4.pdf]

**Cryomicroscopy of radiation sensitive specimens on unmodified graphene sheets: reduction of electron-optical effects of charging**

Kasim Sader, Martyn Stopps, Lesley J. Calder, Peter B. Rosenthal

**Table S1.** Intensity of high resolution ( $\sim 4 \text{ \AA}$ ) reflections in Fourier transforms of paraffin images.

| Image Identifier | I(g)/I(0) |          |          |
|------------------|-----------|----------|----------|
|                  | (1,1)     | (-1,1)   | (2,0)    |
| 20111026_006_03  | 3.59E-05  | 9.32E-06 | 7.59E-05 |
| 20111026_007     | 2.85E-04  | 8.77E-05 | 9.86E-06 |
| 20111026_008     | 2.82E-04  | weak     | 2.54E-05 |
| 20111026_009     | 9.64E-06  | 3.38E-05 | 7.72E-05 |
| 20111026_012     | 4.19E-05  | 6.35E-05 | 5.12E-05 |
| 20111025_006_03  | 1.16E-04  | 1.09E-05 | 1.93E-05 |
| 20111025_006_05  | 1.73E-05  | 1.04E-05 | 6.84E-06 |
| 20111025_007_03  | 3.43E-05  | 1.13E-05 | 5.71E-06 |
| 20120503_019     | 5.95E-04  | 8.46E-05 | 2.70E-05 |
