# Supplementary figures and images for: Cryomicroscopy of radiation sensitive specimens on unmodified graphene sheets: Reduction of electron-optical effects of charging
Source: PubMed Central journal article supplement — J Struct Biol. 2013 Sep;183(3):531–6. doi: 10.1016/j.jsb.2013.04.014 (PMC3778975; doi:10.1016/j.jsb.2013.04.014), 2013-09

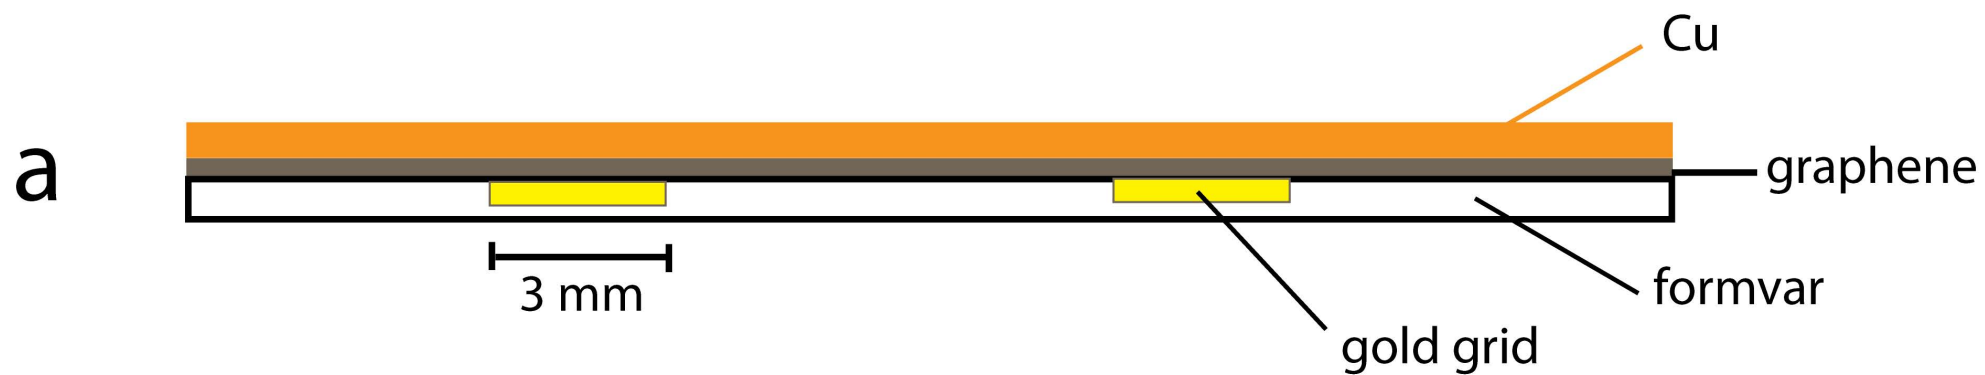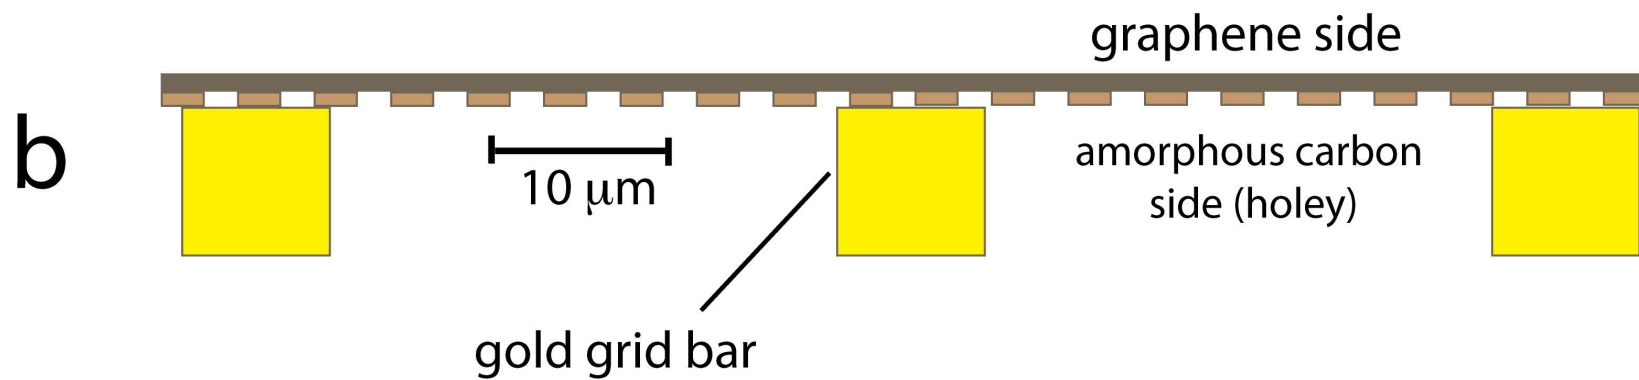

Figure S1

Supplement: mmc1.pdf [file mmc1.pdf]

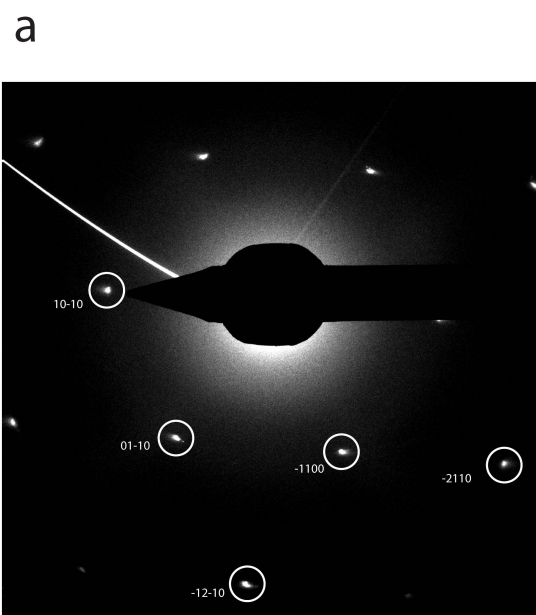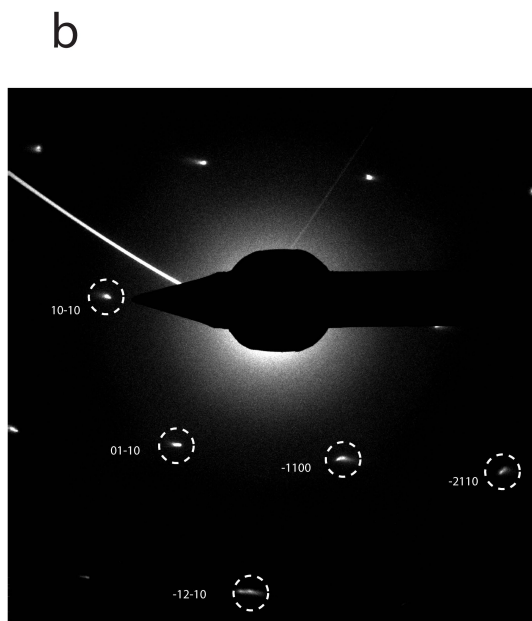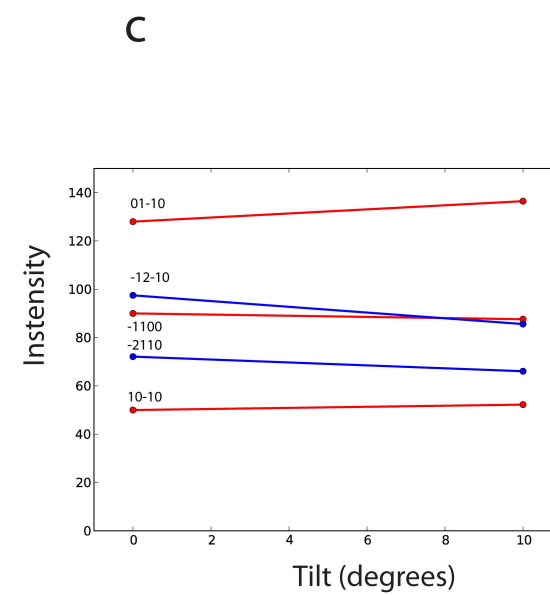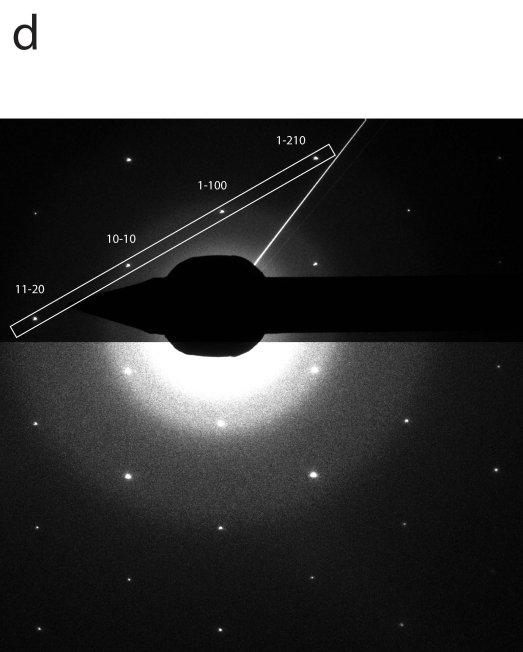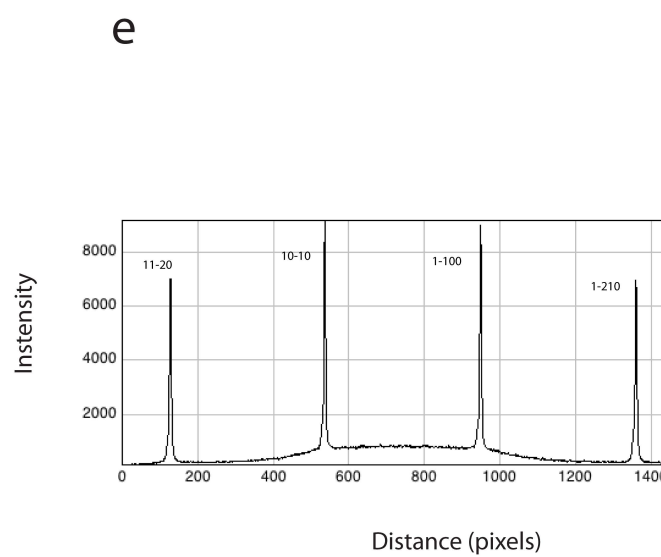

Figure S2

Supplement: mmc2.pdf [file mmc2.pdf]
